# Supplementary material
Source: PubMed Central journal article supplement (PMC2661026)
Supplement: NIHMS103131-supplement-3.pdf [file NIHMS103131-supplement-3.pdf]

**Author: Please check off each of the points below to indicate that it has been addressed. Then sign at the bottom and return by fax (212-696-0978) along with the license, manuscript summary, and competing financial interest forms.**

## Special Considerations

- X Please modify your figures as indicated on the attached PDF.
- X For equations and special characters, only those that will be set apart from the text may be in an Equation Editor format; those embedded in the text must be in Word format.
- X Subheadings (in Results/Discussion) must fit onto one line in print—≤58 characters including spaces—and should refer to at least two paragraphs.**
- X Figures: please indicate nature of error bars (*i.e.*, s.e.m. or s.d.) and magnitude of scale bars (in the figure itself or in the figure legend).
- X Please ensure that figure panels are cited in order in the text, and that all are cited.
- X Please ensure that references are cited in order in the text, and that all are cited. References in figure legends go last in the ref. list.
- X Please confirm that the paper complies with Nature Publishing policy concerning image integrity (see [http://www.nature.com/authors/editorial\\_policies/image.html](http://www.nature.com/authors/editorial_policies/image.html)).

## Affiliations

- X Provide full mailing address (including street address & postal code) for each affiliation.

## Results

- X Avoid describing figures—this should be kept to the figure legends.

## Text—General Points

- X Discuss previous findings (established knowledge) in the present tense; discuss findings of this paper in the past tense ("We found..."; "These cells showed...")
- X Use the active, not passive, voice throughout the main body of the text and in the Methods section. For example, (i) is preferable to (ii) in the following example:
  - (i) We obtained aliquots of 5–30 ml of peripheral blood from each family member.
  - (ii) 5–30 ml of peripheral blood were obtained from each family member.
- X Define all abbreviations and symbols the first time they are used. Two-letter abbreviations are not permitted; please spell out.
- X We do not permit specific mention of other authors by name; use citation numbers only.
- X Use the style (**Fig. 1a,c,f**), (**Fig. 2a–c**), (**Figs. 2 and 3**), (**Fig. 1 and Table 2**) to refer to figures in the text (parentheses, commas and en dashes not bold). Figure citations in the text should not refer to

specific parts of display items (such as gel lanes, tissue sections, arrows etc.). Avoid the construction "Figure 1 shows that...."

## Text—Formatting

- X Throughout text AND figures and tables, please use the 'en-dash' (–), which is slightly wider than a hyphen (-), for negative and minus signs and number ranges. On a PC: Ctrl then minus key; on a Mac, Option then minus key.
- X Genes and genotypes (and all constructs that are DNA, cDNA or RNA) must be *italicized* throughout text and figures and given the correct designation according to the species (see above).
- X Refer to mutants as  $DAT^{r/-}$  (note that these are superscript en-dash symbols), not as "-/-" or "KO".
- X Make sure all Greek letters ( $\alpha$ ,  $\beta$ ,  $\gamma$ ,  $\mu$ ) and mathematical symbols ( $^{\circ}$ ,  $\times$  (for scientific notation and magnification),  $\pm$ ) are in Symbol font. If using Microsoft Word, use Insert > Symbol to ensure the symbols are not lost in typesetting. Note that the  $\pm$  and  $\geq$  signs are found in the Symbol font and are not simply + and > underlined.

## Reference List

- X No more than **50**; format the citations as<sup>1,2,3-5</sup>.
  - o Journal article example: Jennings, C.J., Mitsu, B. & Carr, K.R. Where to publish your research. *Proc. Natl. Acad. Sci. USA* **73**, 208–212 (1996).
  - o Book chapter example: Wenz, C. *et al.* Scientific publishing takes the cake. in *The Production Nightmare 2<sup>nd</sup> edn.* Vol. 56 (eds. Whittock, K. & Raphe, N.) 222–333 (Oxford Univ. Press, New York, 1935).
- X Only papers that have been published or are in press should be in the reference list. Papers in preparation should be cited parenthetically in the text (as 'unpublished data' or 'data not shown'). Please cite unrefereed, unpublished abstracts in the text in the form (A.B. Author & C.D. Author, *Soc. Neurosci. Abstr.* 243.3, 1996).

## Supplementary web material

- X Each piece of Supplementary Information must be given a unique name and be cited by individual name, in order, in the text.
- X Provide a tabular list (electronic copy), named 'SI Guide', of all supplementary items and provide a brief, specific title for each supplementary table, figure, video or audio. Please use the 'Supplementary Information Titles' template at the end of this document; you may fill the table in and submit as a separate file or include the table at the end of your main manuscript text file. Full captions should still be included at the end of the Word document of your main manuscript.
- X Please submit supplementary figures, tables and text as PDFs, and preferably as one combined PDF (with the pieces in the order figures, tables, text). Include the legend on the same page as each supplementary figure.
- X Please list the title and authors of your paper at the top of the first piece of Supplementary Information.

X Provide a labeled hard copy for each piece.

X Personal or outside websites should not be called 'Supplementary Information'; this term refers only to supplementary items posted on Nature Neuroscience website.

**Author signature:**

A handwritten signature in black ink, appearing to be 'AWM', written in a cursive style.

**Date: Dec 01, 2008**
